# Supplementary material for: Tracking CNS and systemic sources of oxidative stress during the course of chronic neuroinflammation
Source: PubMed Central journal article supplement (PMC4654749; doi:10.1007/s00401-015-1497-x), 2015-10-31

# Supplemental Figure 7 - Mossakowski et al.

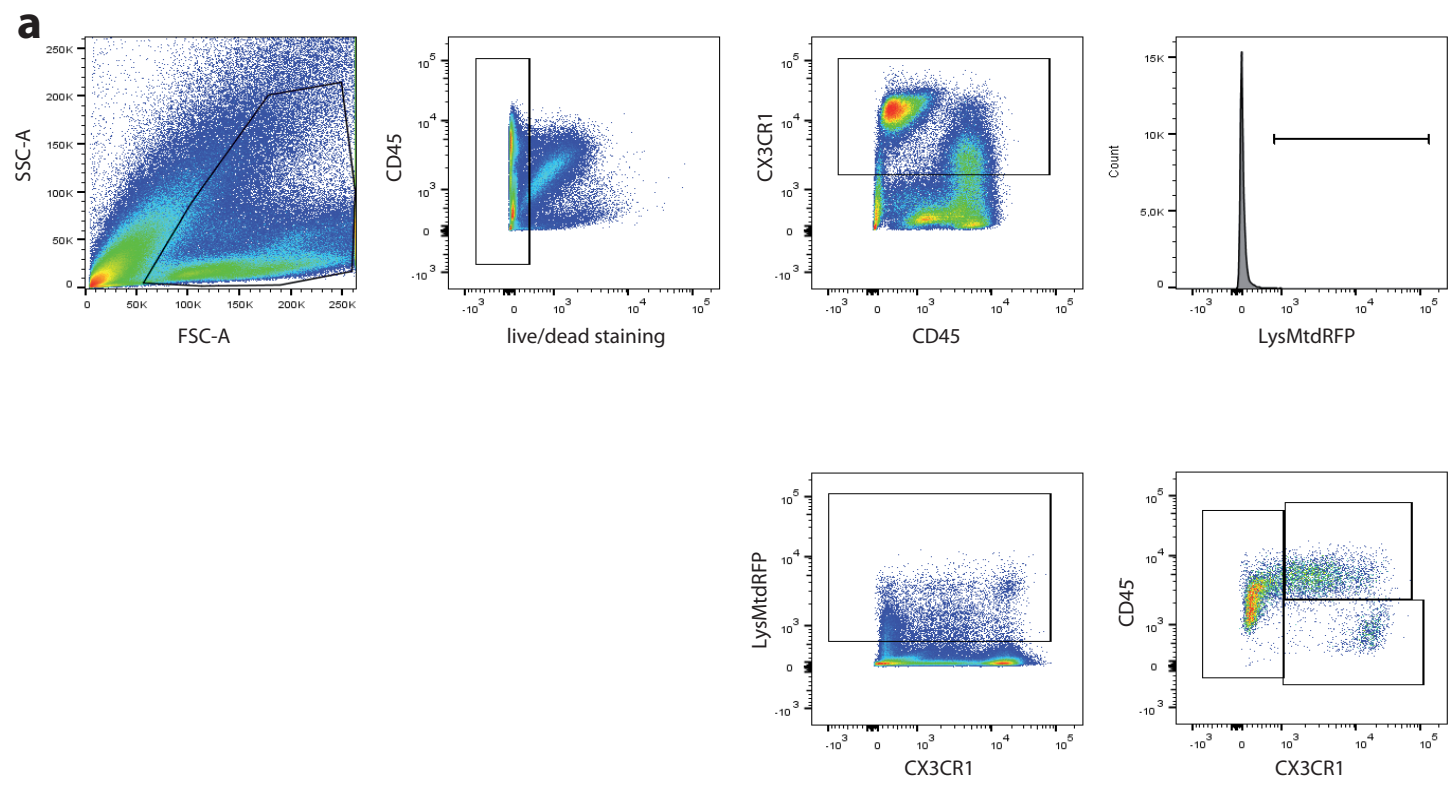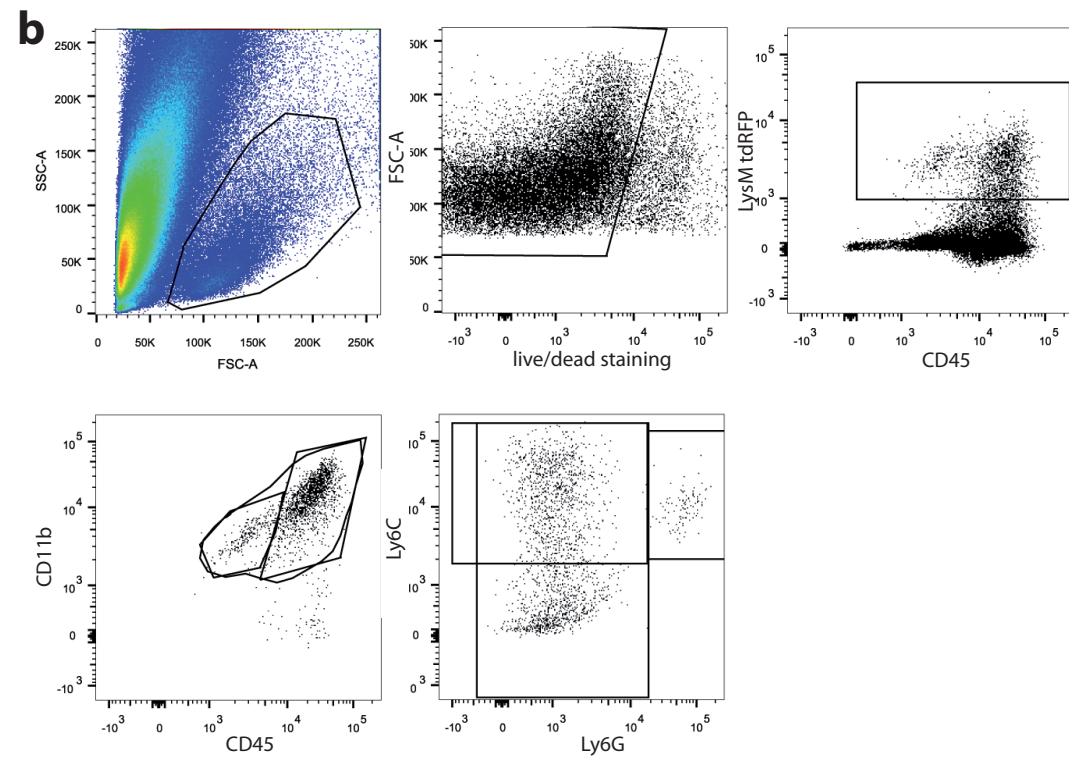

Supplement: 401_2015_1497_MOESM8_ESM.pdf [file 401_2015_1497_MOESM8_ESM.pdf]
